# Supplementary material for: Maternal Exposure to Occupational Asthmagens During Pregnancy and Autism Spectrum Disorder in the Study to Explore Early Development
Source: Springer Nature journal article supplement (doi:10.1007/s10803-016-2882-6), 2016-08-10
Supplement: MOESM1 [file 10575554]

**Supplemental Table 1. Maternal occupational asthmagen exposure by characteristics among children with non-ASD developmental delays or disorders (DDs).**

| Characteristics                                      | DD, N (% exposed)    |                       |
|------------------------------------------------------|----------------------|-----------------------|
|                                                      | Unexposed<br>(N=607) | Exposed<br>(N=86)     |
| Child's Sex                                          |                      |                       |
| Female                                               | 211                  | 23 (9.8) <sup>a</sup> |
| Male                                                 | 396                  | 63 (13.7)             |
| Parity                                               |                      |                       |
| 1                                                    | 283                  | 38 (11.8)             |
| 2                                                    | 212                  | 27 (11.3)             |
| 3 or greater                                         | 112                  | 21 (15.8)             |
| Maternal Race                                        |                      |                       |
| White                                                | 423                  | 52 (10.9)             |
| Black                                                | 103                  | 20 (16.3)             |
| Other <sup>b</sup>                                   | 81                   | 14 (14.7)             |
| Maternal education                                   |                      |                       |
| High school or less                                  | 71                   | 9 (11.3)              |
| Some college/ trade                                  | 152                  | 45 (22.8)             |
| Bachelor's degree                                    | 206                  | 21 (9.3)              |
| Advanced degree                                      | 178                  | 11 (5.8)              |
| Current Household Income                             |                      |                       |
| <\$30,000                                            | 109                  | 21 (16.2)             |
| \$30,000 – 70,000                                    | 174                  | 27 (13.4)             |
| \$70,000 – 110,000                                   | 160                  | 22 (12.1)             |
| ≥\$110,000                                           | 164                  | 16 (8.9)              |
| Maternal Age at Birth                                |                      |                       |
| <25 years old                                        | 75                   | 12 (13.8)             |
| 25-29 years old                                      | 128                  | 30 (19.0)             |
| 30-34 years old                                      | 215                  | 28 (11.5)             |
| ≥35 years old                                        | 189                  | 16 (7.8)              |
| Maternal Psychiatric Condition                       |                      |                       |
| No                                                   | 416                  | 61 (12.8)             |
| Yes                                                  | 191                  | 25 (11.6)             |
| Maternal Smoking During Pregnancy                    |                      |                       |
| No                                                   | 549                  | 75 (12.0)             |
| Yes                                                  | 58                   | 11 (15.9)             |
| Maternal Asthma Prior to Child's Birth <sup>c</sup>  |                      |                       |
| No                                                   | 407                  | 60 (12.8)             |
| Yes                                                  | 152                  | 19 (11.1)             |
| Maternal Allergy Prior to Child's Birth <sup>d</sup> |                      |                       |
| No                                                   | 325                  | 50 (13.3)             |
| Yes                                                  | 233                  | 31 (11.7)             |

<sup>a</sup> Percent exposed within DD controls

<sup>b</sup> Includes Asian, Hispanic (race not specified), multiracial, and all others

<sup>c</sup> 55 DD are missing information on maternal asthma prior to child's birth

<sup>d</sup> 54 DD are missing information on maternal allergy prior to child's birth

**Supplemental Table 2: Crude and adjusted odds ratios and 95% confidence intervals for non-ASD developmental delays or disorders (DD) comparing maternal occupational asthmagen exposure to unexposed.**

| Exposure             | POP<br>(n=710) |      | DD<br>(n=693) |      | cOR (95% CI)       | aOR <sup>a</sup> (95% CI) |
|----------------------|----------------|------|---------------|------|--------------------|---------------------------|
|                      | N              | %    | N             | %    |                    |                           |
| Any Asthmagen        | 95             | 13.4 | 86            | 12.4 | 0.92 (0.67 - 1.25) | 0.85 (0.61 - 1.18)        |
| Any HMW <sup>b</sup> | 69             | 9.7  | 63            | 9.1  | 0.93 (0.65 - 1.33) | 0.85 (0.59 - 1.24)        |
| Latex                | 63             | 8.9  | 51            | 7.4  | 0.82 (0.56 - 1.20) | 0.79 (0.53 - 1.18)        |
| Any LMW <sup>c</sup> | 45             | 6.3  | 38            | 5.5  | 0.86 (0.55 - 1.34) | 0.69 (0.43 - 1.12)        |
| Reactive             | 34             | 4.8  | 29            | 4.2  | 0.87 (0.52 - 1.44) | 0.76 (0.45 - 1.29)        |
| Cleaning             | 20             | 2.8  | 22            | 3.2  | 1.13 (0.61 - 2.09) | 0.71 (0.37 - 1.38)        |

POP = population controls, cOR = crude odds ratio, aOR = adjusted odds ratio

<sup>a</sup> Analyses adjusted for maternal race, maternal education, current household income at time of questionnaire, maternal age at birth, parity, active smoking during pregnancy, maternal psychiatric condition history, and child's sex.

<sup>b</sup> HMW = high molecular weight

<sup>c</sup> LMW = low molecular weight

**Supplemental Table 3: Crude and adjusted odds ratios and 95% confidence intervals for ASD and DD comparing maternal occupational asthmagen exposed to unexposed where mothers without a pregnancy job are classified as unexposed.<sup>a</sup>**

| Exposure             | ASD vs POP         |                           | DD vs POP          |                           |
|----------------------|--------------------|---------------------------|--------------------|---------------------------|
|                      | cOR (95% CI)       | aOR <sup>b</sup> (95% CI) | cOR (95% CI)       | aOR <sup>b</sup> (95% CI) |
| Any Asthmagen        | 1.21 (0.88 - 1.66) | 1.21 (0.85 - 1.73)        | 0.84 (0.62 - 1.14) | 0.81 (0.59 - 1.12)        |
| Any HMW <sup>c</sup> | 1.22 (0.84 - 1.75) | 1.25 (0.83 - 1.86)        | 0.85 (0.60 - 1.21) | 0.85 (0.59 - 1.23)        |
| Latex                | 1.07 (0.72 - 1.58) | 1.08 (0.70 - 1.67)        | 0.75 (0.51 - 1.10) | 0.78 (0.53 - 1.16)        |
| Any LMW <sup>d</sup> | 1.18 (0.76 - 1.85) | 1.01 (0.61 - 1.67)        | 0.79 (0.51 - 1.23) | 0.64 (0.40 - 1.02)        |
| Reactive             | 1.22 (0.74 - 2.03) | 1.14 (0.65 - 2.01)        | 0.80 (0.48 - 1.32) | 0.73 (0.43 - 1.23)        |
| Cleaning             | 1.29 (0.68 - 2.46) | 0.79 (0.38 - 1.64)        | 1.04 (0.56 - 1.92) | 0.61 (0.32 - 1.17)        |

ASD = ASD cases, DD= non-ASD developmental delay or disorder, POP = population controls, cOR = crude odds ratio, aOR = adjusted odds ratio

<sup>a</sup> Jobs for which we were unsure of overlap with pregnancy were excluded from these analyses.

Analyses include 647 ASD, 976 DD, and 921 POP.

<sup>b</sup> Analyses adjusted for maternal race, maternal education, current household income at time of questionnaire, maternal age at birth, parity, active smoking during pregnancy, maternal psychiatric condition history, and child's sex.

<sup>c</sup> HMW = high molecular weight

<sup>d</sup> LMW = low molecular weight
